# Supplementary material for: The kallikrein-Kinin system modulates the progression of colorectal liver metastases in a mouse model
Source: Springer Nature journal article supplement (doi:10.1186/s12885-018-4260-6), 2018-04-04
Supplement: MOESM1 [file 15590812]

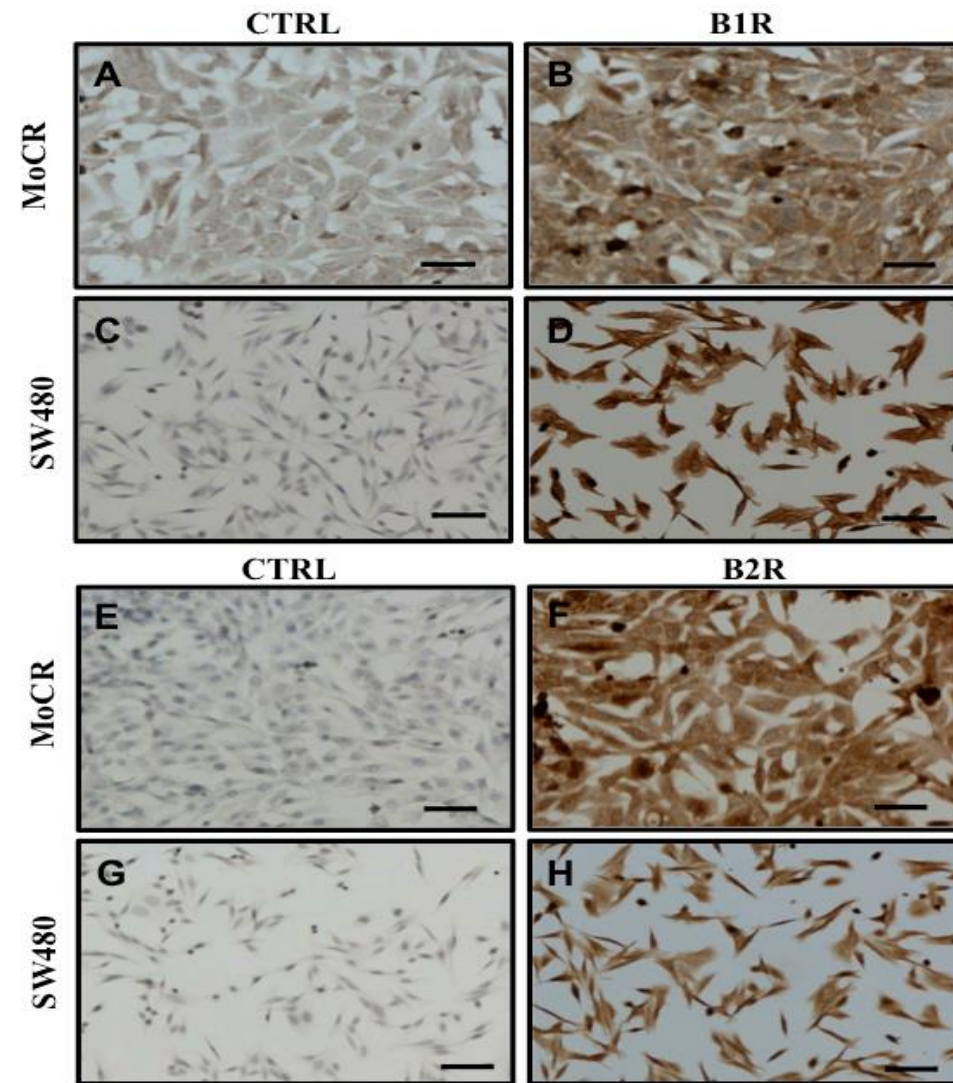

**Additional File 1: Immunocytochemistry for detection of B1R and B2R on the colorectal cancer cell lines MOCR and SW480.** [A] MoCR cells stained with naive rabbit IgG, [B] MoCR cells stained with rabbit anti-B1R, [C] SW480 cells stained with naive rabbit IgG, [D] SW480 cells stained with rabbit anti-B1R, [E] MoCR cells stained with naive rabbit, [F] MoCR cells stained with rabbit anti-B2R, [G] SW480 cells stained with naive rabbit IgG, and [H] SW480 cells stained with rabbit anti-B2R. Images taken at 20x magnification. Bar = 50 $\mu$ m.
