# Supplementary material for: The kallikrein-Kinin system modulates the progression of colorectal liver metastases in a mouse model
Source: Springer Nature journal article supplement (doi:10.1186/s12885-018-4260-6), 2018-04-04
Supplement: MOESM2 [file 15590812]

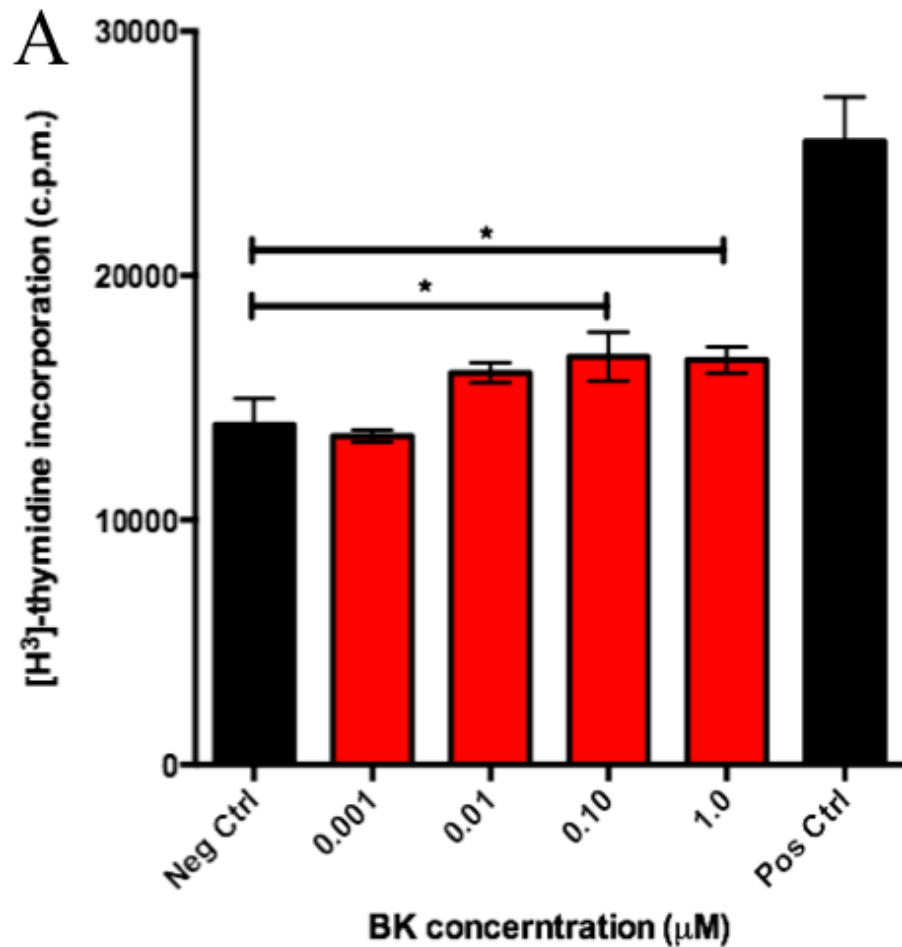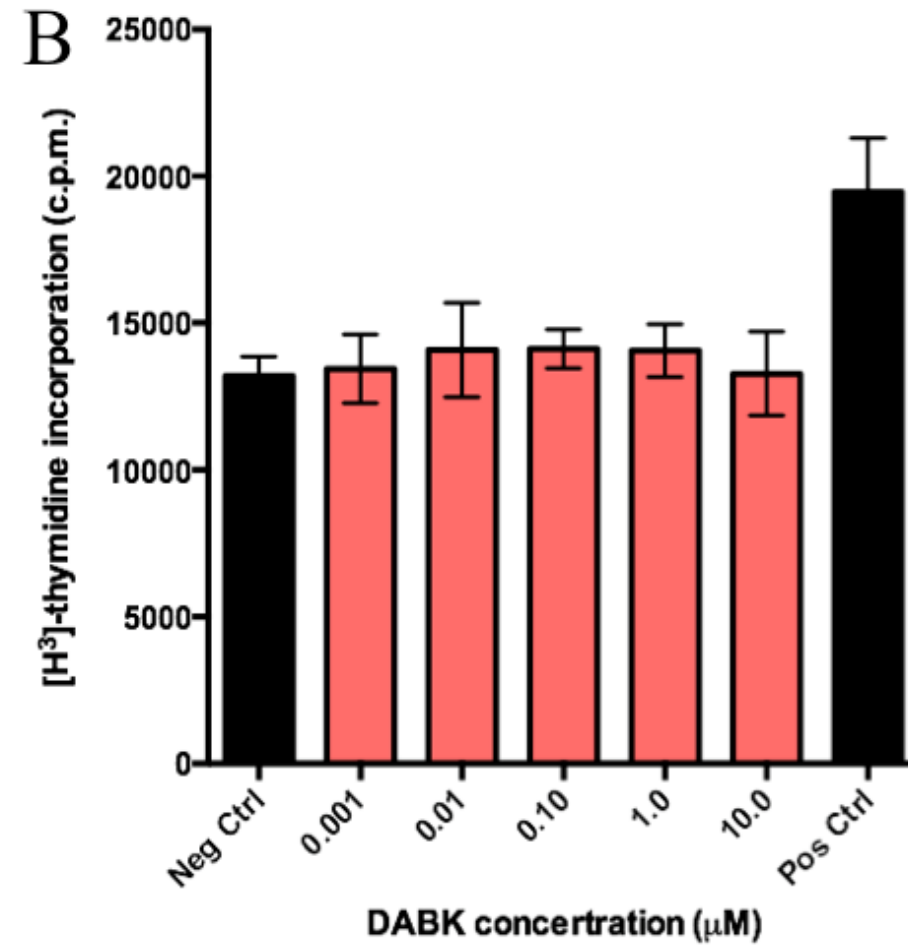

**Additional file 2. The proliferative effect on MoCR cells exposed to kinins.** MoCR cells were cultured for 48 hours in RPMI media treated with [A] BK (0.001, 0.01, 0.10 and 1.0 μM) and [B] DABK (0.001, 0.01, 0.10, 1.0 and 10.0 μM). The negative control was RPMI media contain no FBS; the positive control was RPMI media containing 5% FBS. Results are presented as mean ± SD, 4 replicates per group (\*p<0.05 compared to negative control).
