# Supplementary material for: The kallikrein-Kinin system modulates the progression of colorectal liver metastases in a mouse model
Source: Springer Nature journal article supplement (doi:10.1186/s12885-018-4260-6), 2018-04-04
Supplement: MOESM3 [file 15590812]

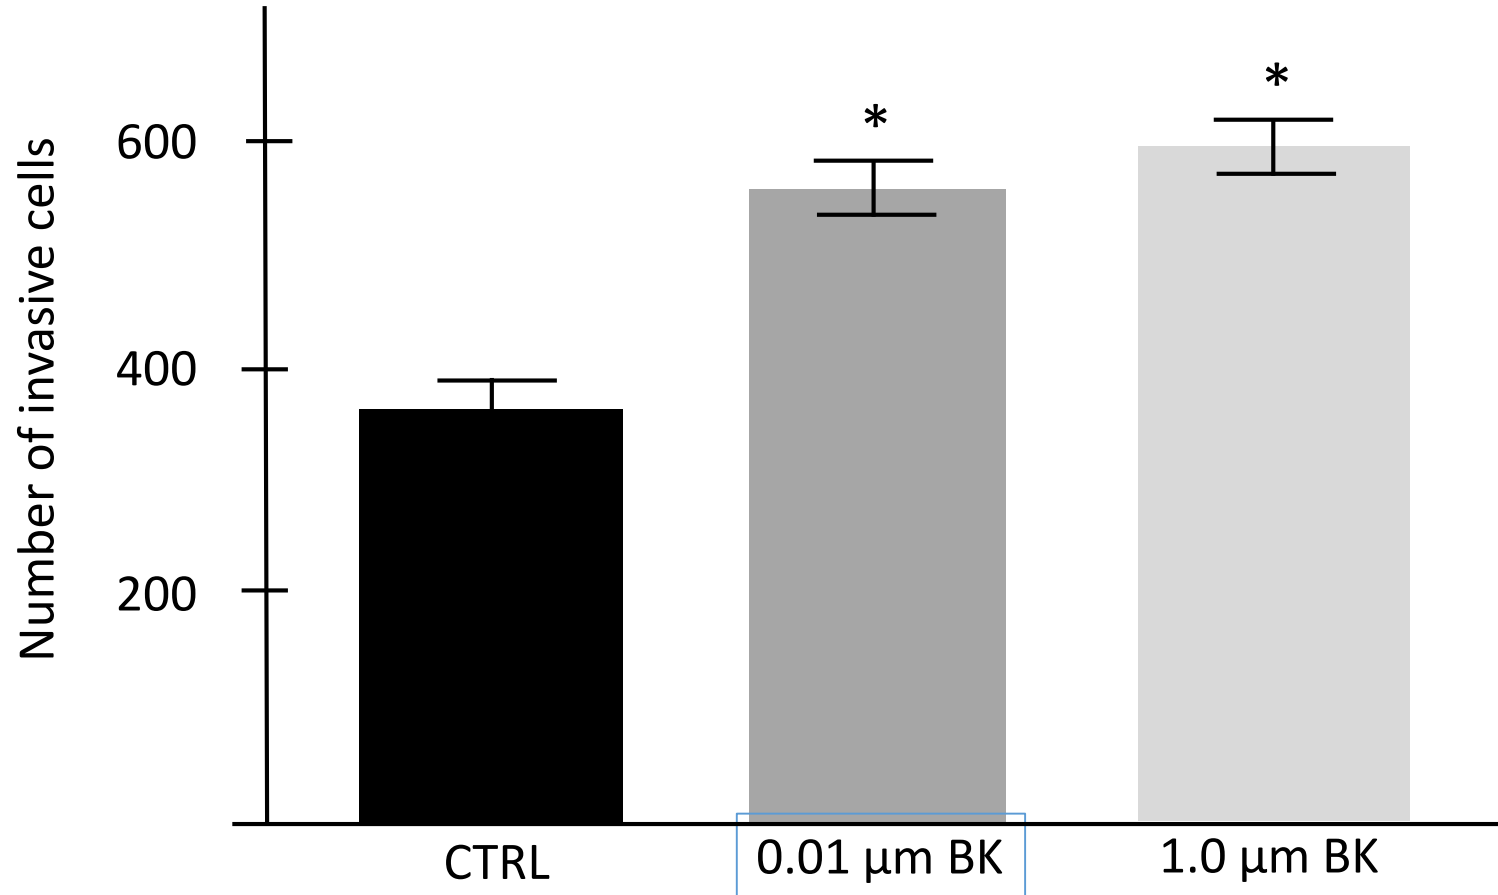

**Additional File 3: Effects of BK on MoCR cell migration/invasion.** A Boyden chamber assay was used. Transwell inserts (8  $\mu\text{m}$  pore size membrane) were coated with fibronectin. Cells were loaded into the upper chamber and BK was added to the lower chamber containing serum-free media. The number of invading cells was counted after staining the membrane with eosin/thiazine. Exposure to 0.1 and 1  $\mu\text{M}$  BK increased MoCR cell migration in a dose dependent manner. Results are from three independent experiments in triplicate (average  $\pm$  SEM), \* $p < 0.05$ .
